# Supplementary material for: Biochemical Characterization of the Rice Cinnamyl Alcohol Dehydrogenase Gene Family
Source: PubMed Central journal article supplement (PMC6222663; doi:10.3390/molecules23102659), 2018-10-16
Supplement: molecules-23-02659-s001.pdf [file molecules-23-02659-s001.pdf]

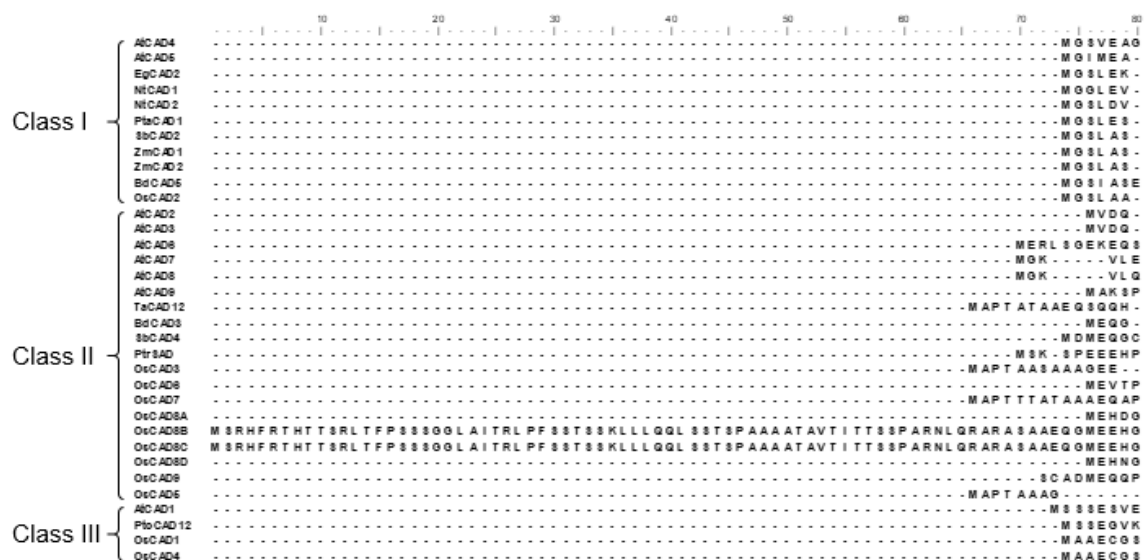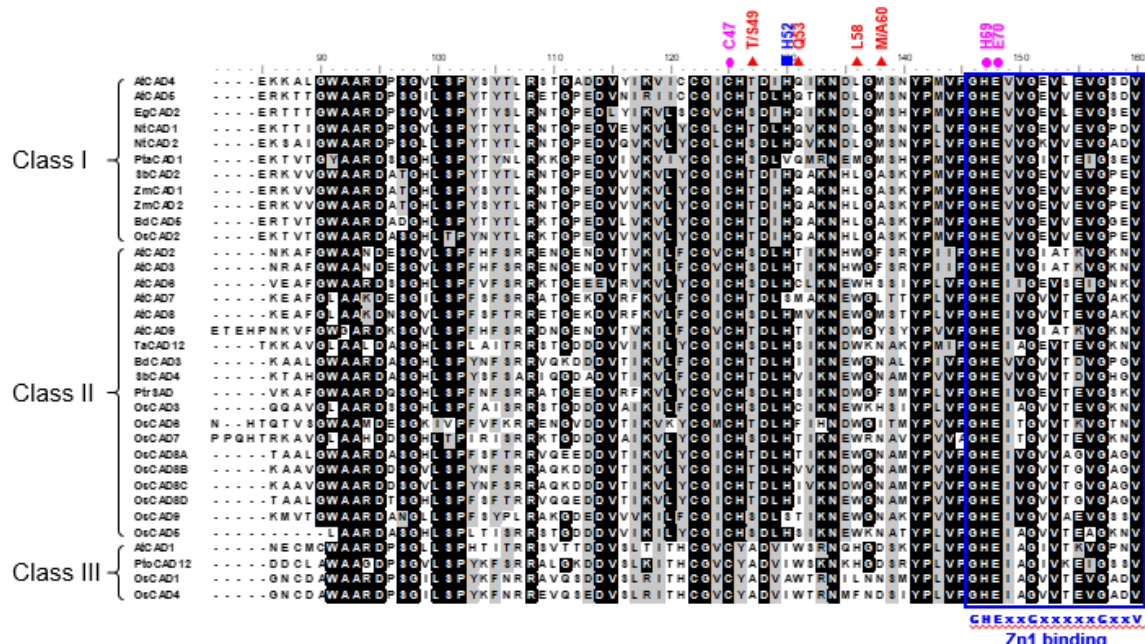

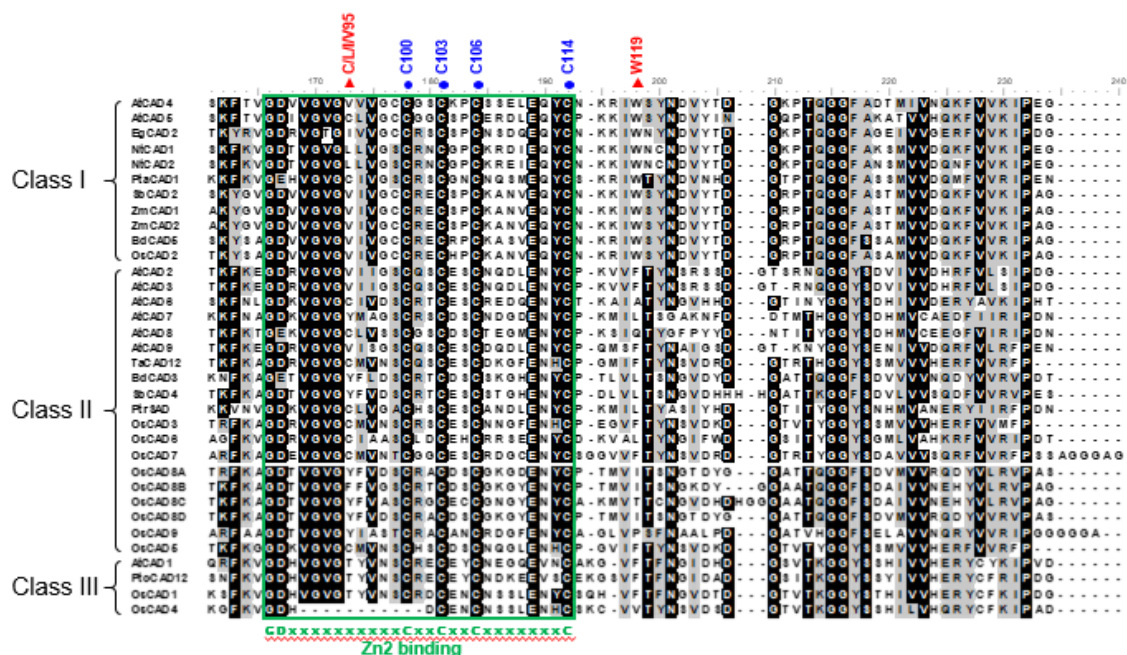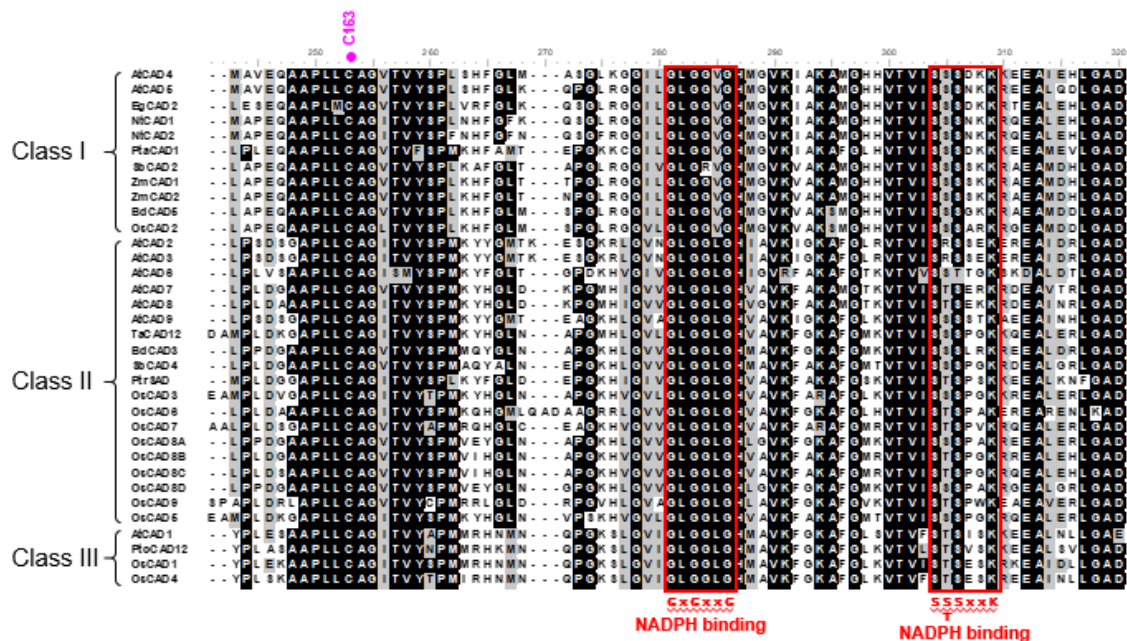

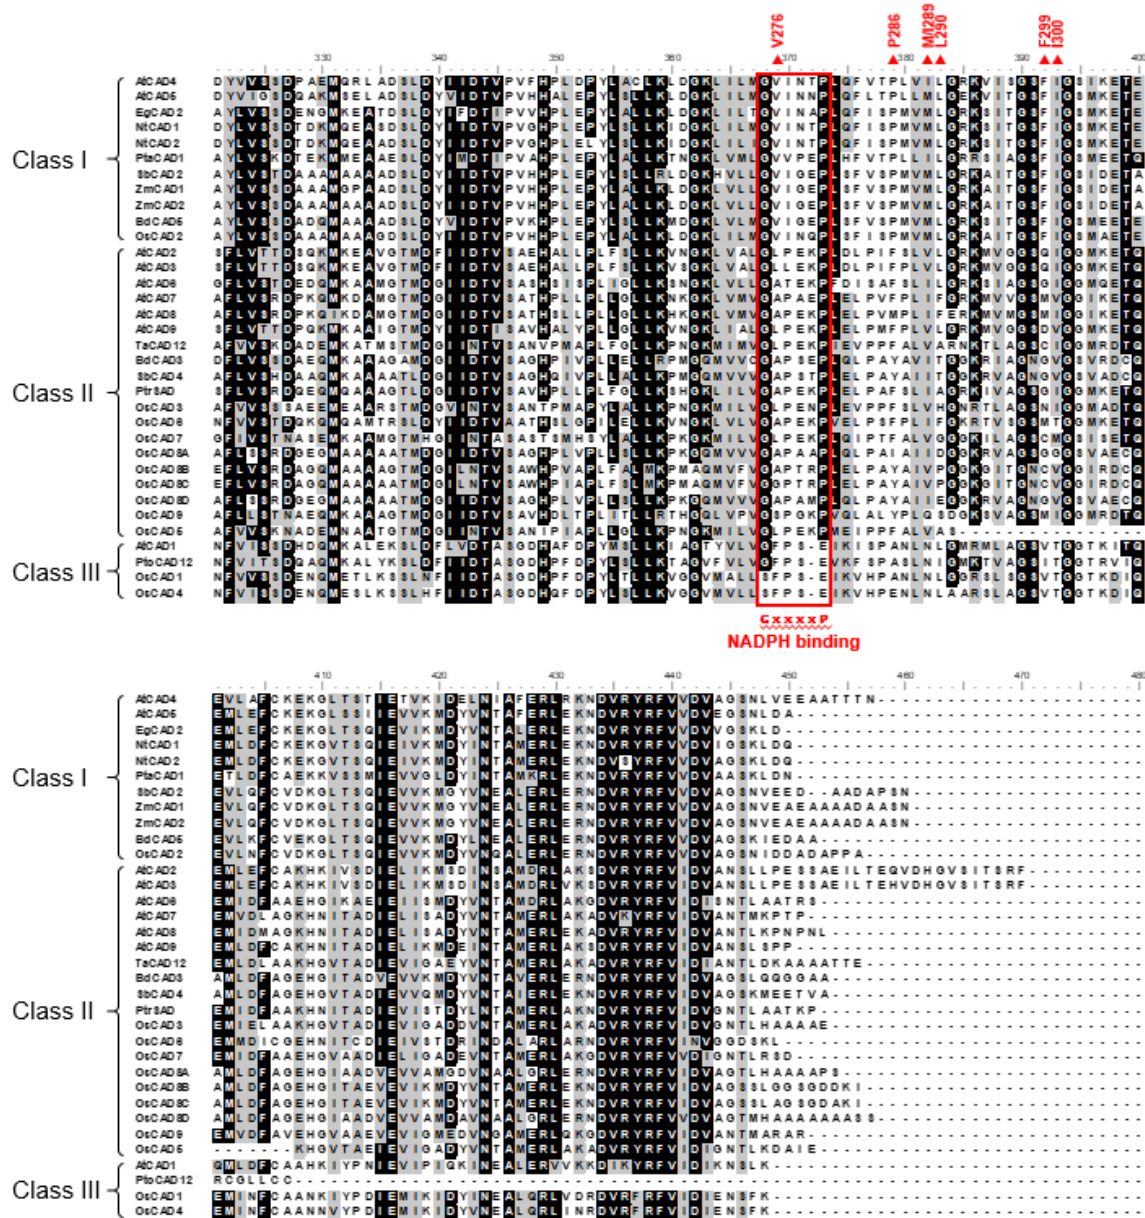

**Figure S1.** Alignment of amino acid sequences of OsCADs and other plant CADs. The shaded amino acids denoted identical or similar amino acids. The blue and green boxes indicate the Zn1 and Zn2 binding motives, respectively. The red boxes indicate NADPH binding motives. The consensus sequences are indicated below the aliments (x indicates any amino acid). Pink and blue circles indicate the conserved amino acids coordinated with the catalytic Zn<sup>2+</sup> ion and the structural Zn<sup>2+</sup> ion, respectively. Red triangles indicate the residues constituting the substrate binding pocket. Numbering of amino acids were follows *AtCAD5*. Amino acid sequences used are *AtCAD1-9* from *A. thaliana*, *EgCAD2* from *E. gunnii*, *NtCAD1* and 2 from *N. tabacum*, *PtaCAD1* from *P. taeda*, *SbCAD2* and 4 from *S. bicolor*, *ZmCAD1* and 2 from *Z. mays*, *BdCAD3* and 5 from *B. distachyon*, *TaCAD12* from *T. aestivum*, *PtoCAD12* from *P. tomentosa*, and *PtrSAD* from *P. tremuloides*.

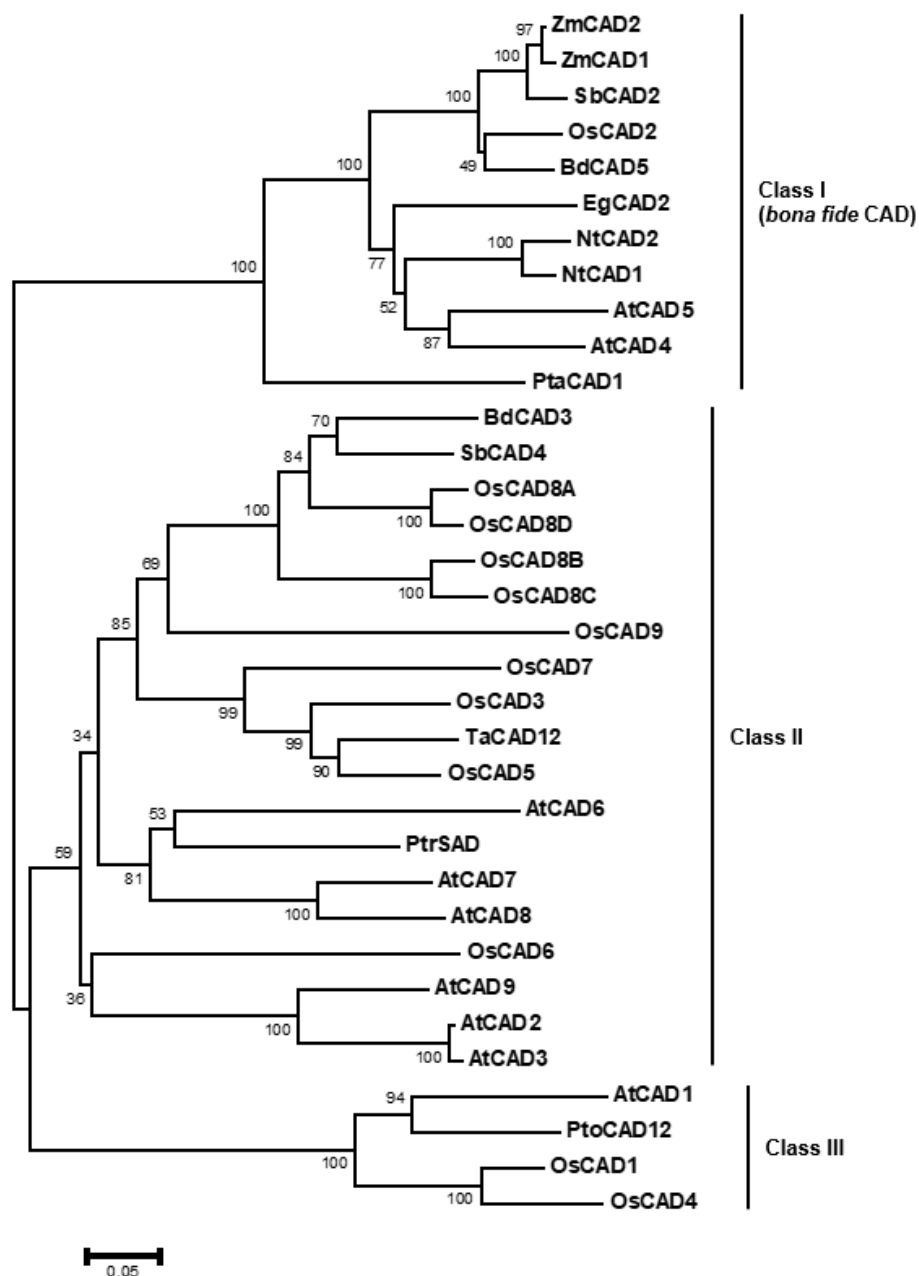

**Figure S2.** Phylogenetic analysis of OsCADs and other plant CADs. The phylogenetic tree was conducted using neighbor-joining criteria with the bootstrap values at 1,000 replicates using MEGA6. AtCAD1-9 from *A. thaliana*, EgCAD2 from *E. gunnii*, NtCAD1 and 2 from *N. tabacum*, PtaCAD1 from *P. taeda*, SbCAD2 and 4 from *S. bicolor*, ZmCAD1 and 2 from *Z. mays*, BdCAD3 and 5 from *B. distachyon*, TaCAD12 from *T. aestivum*, PtoCAD12 from *P. tomentosa*, and PtrSAD from *P. tremuloides*.



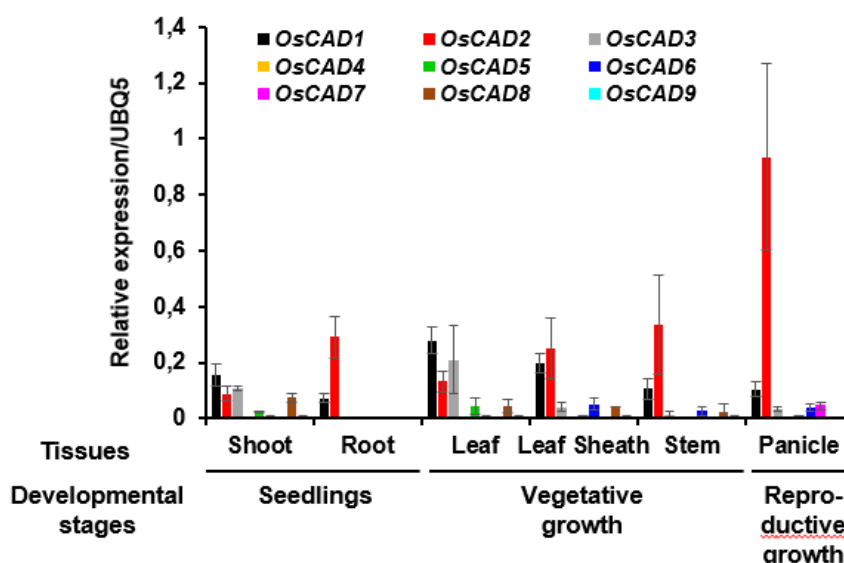

**Figure S3.** Quantitative real-time PCR analysis of *OsCAD* gene expression in rice tissues from different developmental stages. A ubiquitin gene (*OsUBQ5*) was amplified using specific primers and used as an internal control. Expression levels of each *OsCAD* gene are presented as the relative expression compared to *OsUBQ5*. The qRT-PCR analysis was performed on the triplicate biological samples.

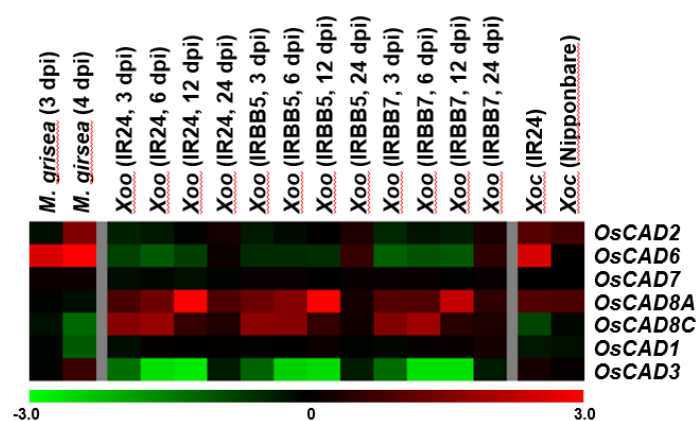

**Figure S4.** *In silico* transcriptomic analysis of *OsCAD* gene expression in response to biotic stress. The public microarray data of *OsCAD* genes were downloaded from the Genevestigator plant biology database ([https://genevestigator.com/gv/doc/intro\\_plant.jsp](https://genevestigator.com/gv/doc/intro_plant.jsp)). The expression patterns of *OsCAD*s were analyzed by 3 and 4 days after infection of *Magnaporthe grisea*. The expression patterns of *OsCAD*s in rice infected with different pathogenic lines of *Xanthomonas oryzae* pv. *oryzae* (*Xoo*) and *X. oryzae* pv. *oryzicola* (*Xoc*) are shown. The color scale represents the log<sub>2</sub> fold changes of gene expression in response to *M. grisea*, *Xoo* and *Xoc* infections. Heatmaps were generated using the Multi Experiment Viewer program (<http://www.tm4.org/mev.html>).

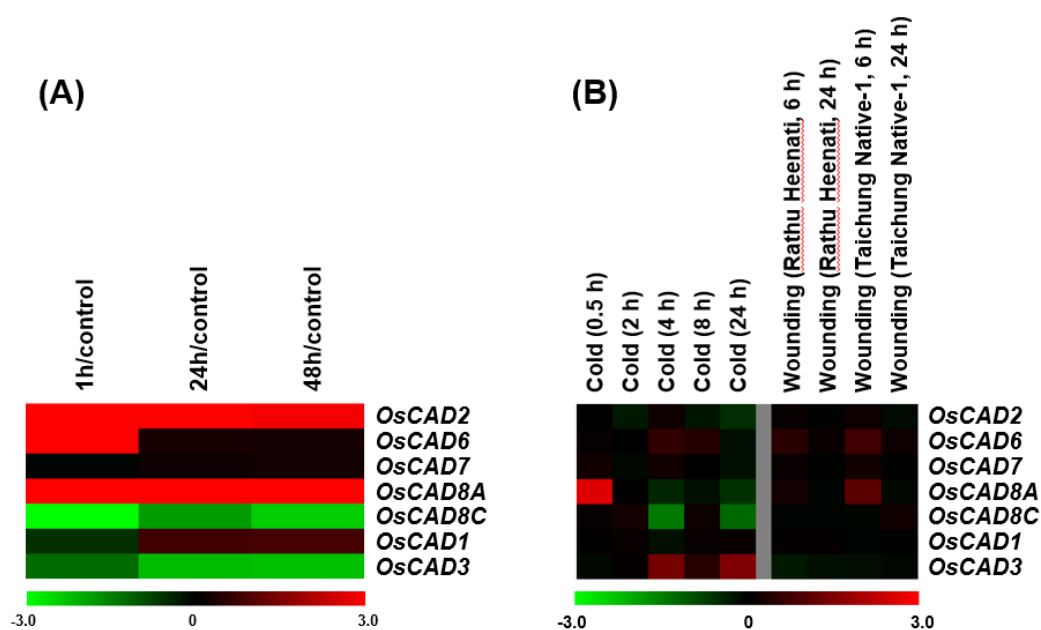

**Figure S5.** *In silico* transcriptomic analysis of *OsCAD* expression in response to abiotic stress. (A) The expression patterns of *OsCADs* in UV-treated rice leaves. Microarray data previously obtained from rice leaves 1, 24 and 48 h after UV treatment (Park et al., 2013) were used for the analysis. (B) The expression patterns of *OsCADs* in cold- and wounding-treated rice samples. Microarray data of cold- and wounding-treated rice samples were obtained from the Genevestigator plant biology database. The color scale represents the  $\log_2$  fold changes of gene expression in response to abiotic stress conditions. Heatmaps were generated using the Multi Experiment Viewer program (<http://www.tm4.org/mev.html>).

**Table S1.** Sequence homologies between the deduced amino acid sequences of the OsCADs and *bona fide* CADs from other plants. The values show the percentage of amino acid identities and similarities. Left and right numbers indicate the identities and similarities, respectively.

|         | AtCAD4 | AtCAD5 | EgCAD2 | NtCAD1 | NtCAD2 | PtaCAD1 | SbCAD2 | ZmCAD1 | ZmCAD2 |
|---------|--------|--------|--------|--------|--------|---------|--------|--------|--------|
| OsCAD1  | 44/64  | 45/64  | 46/65  | 46/65  | 46/65  | 47/68   | 42/61  | 42/61  | 42/61  |
| OsCAD2  | 71/83  | 72/84  | 74/83  | 75/85  | 73/84  | 65/81   | 86/93  | 87/92  | 87/93  |
| OsCAD3  | 45/64  | 46/63  | 47/64  | 46/65  | 46/64  | 49/67   | 43/62  | 44/63  | 44/63  |
| OsCAD4  | 40/59  | 44/60  | 42/61  | 42/60  | 42/60  | 45/64   | 39/57  | 39/57  | 39/57  |
| OsCAD5  | 42/57  | 44/60  | 44/59  | 45/60  | 45/60  | 46/65   | 42/58  | 42/59  | 42/59  |
| OsCAD6  | 45/64  | 45/65  | 46/65  | 48/66  | 47/65  | 48/66   | 44/61  | 44/61  | 44/61  |
| OsCAD7  | 43/62  | 43/62  | 44/60  | 43/62  | 44/61  | 45/65   | 41/59  | 41/59  | 42/59  |
| OsCAD8A | 48/63  | 47/63  | 47/63  | 49/65  | 50/66  | 49/67   | 50/63  | 50/63  | 51/64  |
| OsCAD8B | 40/56  | 39/55  | 42/54  | 42/57  | 42/58  | 40/57   | 41/54  | 40/54  | 41/54  |
| OsCAD8C | 40/56  | 40/55  | 41/54  | 43/57  | 43/58  | 40/56   | 41/54  | 40/54  | 41/54  |
| OsCAD8D | 48/63  | 47/62  | 47/62  | 49/64  | 50/65  | 49/67   | 50/63  | 51/64  | 51/64  |
| OsCAD9  | 42/62  | 44/63  | 45/63  | 45/64  | 46/63  | 48/67   | 46/63  | 46/63  | 47/63  |

**Table S2.** Primer sequences and PCR conditions for the cloning of *OsCADs*.

| Gene          | Primer sequence <sup>a</sup>                                                         | Annealing Temp. (°C) |
|---------------|--------------------------------------------------------------------------------------|----------------------|
| <i>OsCAD1</i> | 5'- <u>CATATGGCTGCTGAATGTGGAAG</u> -3'<br>5'- <u>GTCGACCTACTTGAACGAGTTCTCAA</u> -3'  | 50                   |
| <i>OsCAD2</i> | 5'- <u>CATATGGGCAGCCTCGCCGCCGA</u> -3'<br>5'- <u>GAATTCTCAGGCGGGCGGCGTCGG</u> -3'    | 50                   |
| <i>OsCAD6</i> | 5'- <u>CATATGGAGGTCACCCCAACCA</u> -3'<br>5'- <u>GAATTCCTAGAGCTTGGAGTCGCCCC</u> -3'   | 50                   |
| <i>OsCAD7</i> | 5'- <u>CATATGGCGCCGACGACGACGGC</u> -3'<br>5'- <u>GAATTCCTCAATCCGACCTGAGGGTGT</u> -3' | 50                   |



**Table S3.** Primer sequences and PCR conditions for quantitative real-time PCR analysis of *OsCADs*.

| Gene          | Primer sequence                                                    | Annealing Temp. (°C) |
|---------------|--------------------------------------------------------------------|----------------------|
| <i>OsCAD1</i> | 5'- GGCGGAGTTTATCTGGTAGT -3'<br>5'- AAATCTGACATCCGGTCAA -3'        | 55                   |
| <i>OsCAD2</i> | 5'- TGTGTGAGACTCTGACGACTTGTC -3'<br>5'- CATATATTGCGAGGCCGAATTT -3' | 55                   |
| <i>OsCAD3</i> | 5'- CTCTGGCAGGGAGCAACATC -3'<br>5'- AAGCGATACCTGACATCCGC -3'       | 60                   |
| <i>OsCAD4</i> | 5'- GCGACCATGACTGCGAGAAC -3'<br>5'- CCTTTGTTACGGTCCCGTCT -3'       | 60                   |
| <i>OsCAD5</i> | 5'- CAGCATCAAGAACGAGTGGA -3'<br>5'- GAGTGGCACGAGTTCACCAT -3'       | 55                   |
| <i>OsCAD6</i> | 5'- ATGACGAGGAGCCTTGACTA -3'<br>5'- CTCTTACCGAAGATGAGAGGG -3'      | 55                   |
| <i>OsCAD7</i> | 5'- CATGCATGGCATCATCAACA -3'<br>5'- TAGTATCTTGCCCCCTCAA -3'        | 60                   |
| <i>OsCAD8</i> | 5'- TGGGGCAACGCCATGTACCC -3'<br>5'- AGCCCACGCCACCGTGTCG -3'        | 60                   |
| <i>OsCAD9</i> | 5'- ATCGGCGGGATGAGGGATA -3'<br>5'- GTACCTCACGTCTCCCTTCTG -3'       | 60                   |
| <i>UBQ5</i>   | 5'-ACCACTTCGACCGCCACTACT-3'<br>5'-ACGCCTAAGCCTGCTGGTT-3'           | 55/60                |
